# Supplementary material for: Disease-Related Detection with Electrochemical Biosensors: A Review
Source: MDPI journal article supplement (doi:10.3390/s17102375), 2017-10-17
Supplement: s1 [file s1]

## Supporting Information

# Disease-related Detection with Electrochemical Biosensors: A Review

Ying Huang<sup>1</sup>, Jin Xu<sup>1</sup>, Jun Jie Liu<sup>1</sup>, Xiang Yang Wang<sup>3</sup>, Bin Chen<sup>1,2\*</sup>

<sup>1</sup> Chongqing Key Laboratory of Non-linear Circuit and Intelligent Information Processing, College of Electronic and Information Engineering, Southwest University, Chongqing 400715, China, hanhanblala@email.swu.edu.cn

<sup>2</sup> Key Laboratory of Luminescent and Real-Time Analytical Chemistry (Southwest University) Ministry of Education, College of Pharmaceutical Sciences, Southwest University, Chongqing 400715, China.

<sup>3</sup> CET-College of Engineering and Technology, Southwest University, Chongqing 400715, China.

\* Correspondence: Chenbin121@swu.edu.cn; Tel.: +86- 182-2310-5797

**Table S1.** Typical electrochemical-based sensors for detection of disease-related biomolecules

| Analyte                           | Principle                                                                                                                                                    | Advantages/Limitations                                                                                                   | LOD                      | Reference |
|-----------------------------------|--------------------------------------------------------------------------------------------------------------------------------------------------------------|--------------------------------------------------------------------------------------------------------------------------|--------------------------|-----------|
| Antibodies to tTG                 | Gold-based self-assembled monolayers based on biopodal alkane thiols for immobilization of tTG                                                               | low concentration of human IgA antibodies                                                                                | 390 ng/mL                | [70]      |
| Antibodies to tTG                 | Guinea pig protein as the antigen to detect antibodies of tTG in human serum                                                                                 | Rapid binary response, robust, user-friendly, cost-effective/ higher number of clinical samples are needed to be process | -                        | [72]      |
| Anti-hepatitis B virus antibodies | A novel magnetosandwich assay-based biosensor based on AuNPs labels                                                                                          | Simple, low cost, allow its application at doctor-office, lower sample volumes required                                  | 3 mIU/mL                 | [6]       |
| Hepatitis B virus surface antigen | Fe <sub>3</sub> O <sub>4</sub> magnetic nanoparticles as carriers, Au sheet as working electrode, heminG0quadruplex DNAzyme and gold NPs as signal amplifier | Ultrasensitive, simplicity, reliability                                                                                  | 0.19 pg mL <sup>-1</sup> | [66]      |
| CEA                               | Ag/Au nanoparticles to coat on graphene as signal amplifying factor                                                                                          | High sensitivity and selectivity, wide linear response range / the time of analysis is a critical factor                 | 8 pg mL <sup>-1</sup>    | [82]      |
| CEA                               | Nanogold encapsulated HRP label conjugated to the secondary anti-CEA antibody in a sandwich enzyme immunoassay format                                        | Sensitive, only a little instrumentation are required                                                                    | 1.5 ng mL <sup>-1</sup>  | [83]      |

Table S1. Cont.

|                                 |                                                                                                                                                                                                    |                                                                                                                                               |                                                                  |      |
|---------------------------------|----------------------------------------------------------------------------------------------------------------------------------------------------------------------------------------------------|-----------------------------------------------------------------------------------------------------------------------------------------------|------------------------------------------------------------------|------|
| CEA and AFP                     | Uses metal ions tagged immunocolloidal gold nanocomposites as signal tags                                                                                                                          | Good sensitivity and selectivity                                                                                                              | 4.6 pg mL <sup>-1</sup> for CEA, 3.1 pg mL <sup>-1</sup> for AFP | [85] |
| CEA                             | Uses three-dimensional graphene foam as electrode architecture for immunosensing of tumor biomarkers                                                                                               | Accessible to bioaffinity ligands, high density of the immobilized antibody, high electrode conductivity, robust, fast, and sensitive         | 90 pg mL <sup>-1</sup>                                           | [86] |
| CEA                             | Employs three kind of lectins as molecular recognition elements, and gold nanoparticles as platform, horseradish peroxidase functionalized antibody as signal probe, for dual signal amplification | Low detection limit, good sensitivity, wide linear range                                                                                      | 0.03 ng mL <sup>-1</sup>                                         | [87] |
| Prostate specific antigen (PSA) | Uses/immunochromatographic electrochemical biosensor that is based on nanoparticle label                                                                                                           | Rapid, sensitive, reproducible, clinically practical                                                                                          | 0.02 ng mL <sup>-1</sup>                                         | [92] |
| <i>B. anthracis</i> Sap antigen | Uses Au-Pd NPs@BNNs nanohybrid for redox cycle based detection                                                                                                                                     | High catalytic activity, fast                                                                                                                 | 1 pg mL <sup>-1</sup>                                            | [93] |
| PSA                             | Uses an immunosensor based on three different generations of ferrocene cored polyamidiamine dendrimers gold electrode                                                                              | Sensitive, selective and disposable, excellent performance for PSA at the pulse amplitude                                                     | 0.001 ng mL <sup>-1</sup>                                        | [91] |
| PSA                             | Uses gold nanospears that has been electrodeposited as a transducer to immobilize an aptamer of PSA                                                                                                | High surface area to immobilize a high surface concentration of the aptamer sequence, high sensitivity, applicable for clinical analysis      | 50 pg mL <sup>-1</sup>                                           | [94] |
| Folate receptor (FR)            | Adopts homogeneous indium tin oxide (ITO)-based electrochemical detection                                                                                                                          | Simple, convenient immobilization-free ITO-based detection strategy, high selectivity of the terminal protection of small molecule linked DNA | 3.8 fM                                                           | [96] |

Table S1. Cont.

|                                                       |                                                                                                                                                                                                                               |                                                                                                                               |                                               |       |
|-------------------------------------------------------|-------------------------------------------------------------------------------------------------------------------------------------------------------------------------------------------------------------------------------|-------------------------------------------------------------------------------------------------------------------------------|-----------------------------------------------|-------|
| DNA sequences related to herpes simplex viruses (HSV) | Uses Meldola Blue as the hybridization indicator for detection and discrimination of HSV Type I and II                                                                                                                        | Fast, reliable, and low-cost detection                                                                                        | 14.78 fM for probe 1 and 14.77 fM for probe 2 | [33]  |
| Influenza B virus                                     | Uses AuNPs-modified disposable sensor, and Meldola's blue was used as intercalator label for detection of influenza B virus                                                                                                   | Rapid, simple, and sensitive                                                                                                  | $3.3 \times 10^7$ molecule/s in 37 min        | [89]  |
| SNPs                                                  | Uses disposable electrochemical printed chips connected with redox active molecule Hoechst 33258 to detect SNPs from unpurified PCR amplicons                                                                                 | Inexpensive, rapid and hand-held detection systems                                                                            | -                                             | [106] |
| dsDNA corresponding to hepatitis C virus genotype 3a  | Uses gold electrode modified with a SAM composed of the PNA probe and MCH to detect ds-DNA corresponding to HCV3a via triplex formation                                                                                       | Provides the possibility of monitoring the hybridization of the PNA probe with the target dsDNA                               | $1.8 \times 10^{-12}$ M                       | [108] |
| Breast cancer related ssDNA                           | Use $[\text{Fe}_3(\text{CN})_6]^{-3/4}$ as an electrochemical redox couple                                                                                                                                                    | Excellent selectivity for discriminating complementary sequences                                                              | $4.6 \times 10^{-20}$ M                       | [3]   |
| Influenza virus (type A) related DNA sequence         | Uses an E-DNA biosensor by chemical reduction and avidin-biotin conjugation on the surface of a GC electrode for detection of a DNA sequence-specific target DNA                                                              | High sensitivity, wide dynamic detection range, effectively discriminates between a completely complementary target sequences | $8.51 \times 10^{-14}$ M                      | [109] |
| <i>Salmonella</i>                                     | Thiolated <i>Salmonella</i> aptamer ssDNA sequence linked to a GCE electrode, which has been modified with GO and electrode-positing with GNPs                                                                                | High specificity and selectivity to aptamer, fast                                                                             | 3 cfu/mL                                      | [112] |
| Targeted DNA species related to oral cancer           | Uses nicking endonuclease assisted target recycling and the differential diffusivity between electroactive reporter-tagged long DNA and short DNA toward a negatively charged ITO electrode surface for signal amplification. | Simple, rapid, immobilization-free, ultrahigh selective                                                                       | 0.35 pM                                       | [103] |

**Table S1.** *Cont.*

|                                    |                                                                                                                                              |                                                                                                                         |                                                                 |       |
|------------------------------------|----------------------------------------------------------------------------------------------------------------------------------------------|-------------------------------------------------------------------------------------------------------------------------|-----------------------------------------------------------------|-------|
| microRNA                           | Based on the mismatched catalytic hairpin assembly (CHA) amplification to decrease the background reaction signal                            | High specificity, low background signal                                                                                 | 0.6 pM                                                          | [115] |
| microRNA                           | Uses a label-free miRNA biosensor based on a novel isothermal signal amplification strategy                                                  | The simplicity of the one-step label-free detection, isothermal amplification process                                   | 1.0 fM                                                          | [116] |
| Oral cancer-related miRNA          | Based on an electrically magnetic-controllable gold electrode with “junction-probe” strategy and MBs-based enzymatic catalysis amplification | The strength and direction of the magnetic field and the temperature of the electrode’s surface can be easily regulated | $2.2 \times 10^{-19}$ M                                         | [113] |
| miRNA-21                           | Involves a sandwich hybridization assay onto gold nanoparticles modified GCE and enzyme signal amplification                                 | Promising sensing platform, allows the good capture of miRNA-21 target, high sensitivity                                | 100 pM                                                          | [118] |
| Fructosyl valine (FV)              | Uses a single-use, disposable biosensor, which prototype was fabricated using thick film screen-printing technique, for the detection of FV  | Single-use, disposable, high reproducibility                                                                            | 1 $\mu$ M                                                       | [126] |
| Thrombin and adenosine             | Uses a switching structures of aptamers from DNA/DNA duplex to DNA/target complex using MB as an indicator                                   | Simple, convenient, cost effective                                                                                      | 3 nM for thrombin and 10 nM for adenosine                       | [128] |
| MUC1                               | A hairpin oligonucleotide (HO) switch, gold nanoparticles, and enzyme signal amplification                                                   | High specificity, low LOD, and wide linear range                                                                        | 2.2 nM                                                          | [130] |
| CEA and AFP                        | Uses a sandwich-format immunosensor using metal ions tagged immunocolloidal gold nanocomposites as signal tags                               | Good stability, wide linear working ranges were in good agreement with standard ELISA                                   | 4.6 pg mL <sup>-1</sup> (CEA) and 3.1 pg mL <sup>-1</sup> (AFP) | [85]  |
| Vascular endothelial growth factor | Uses a folding-based electrochemical aptasensor for detection of vascular endothelial growth factor                                          | Cost-effective, single-use, sensitive, complex media selectivity, and reusability                                       | 5pM (190pg/mL)                                                  | [138] |

**Table S1.** *Cont.*

|                        |                                                                                                                                                              |                                                  |                                                                |       |
|------------------------|--------------------------------------------------------------------------------------------------------------------------------------------------------------|--------------------------------------------------|----------------------------------------------------------------|-------|
| Adenosine and lysozyme | Uses a bifunctional biosensor for detection of adenosine or lysozyme by virtue of switching structures of aptamers from DNA/DNA duplex to DNA/target complex | Good selectivity, reproducibility, and stability | 0.01 $\mu\text{g mL}^{-1}$ for lysozyme, 0.02 nM for adenosine | [142] |
|------------------------|--------------------------------------------------------------------------------------------------------------------------------------------------------------|--------------------------------------------------|----------------------------------------------------------------|-------|
